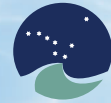

## Corrigendum

### Spatio-temporal dynamics and behavioural ecology of a “demersal” fish population as detected using research survey pelagic trawl catches: the Eastern Baltic Sea cod (*Gadus morhua*)

Michele Casini<sup>1\*,†</sup>, Huidong Tian<sup>1†</sup>, Martin Hansson<sup>2</sup>, Włodzimierz Grygiel<sup>3</sup>, Guntars Strods<sup>4</sup>, Romas Statkus<sup>5</sup>, Elor Sepp<sup>6</sup>, Tomas Gröhsler<sup>7</sup>, Alessandro Orio<sup>1</sup>, and Niklas Larson<sup>1</sup>

<sup>1</sup>Department of Aquatic Resources, Institute of Marine Research, Swedish University of Agricultural Sciences, Lysekil, Sweden

<sup>2</sup>Swedish Meteorological and Hydrological Institute, Gothenburg, Sweden

<sup>3</sup>Department of Fisheries Resources, National Marine Fisheries Research Institute, Gdynia, Poland

<sup>4</sup>Department of Fish Resources Research, Institute of Food Safety, Animal Health and Environment, Riga, Latvia

<sup>5</sup>Fisheries Service under the Ministry of Agriculture, Klaipeda, Lithuania

<sup>6</sup>Estonian Marine Institute, University of Tartu, Tallinn, Estonia

<sup>7</sup>Thünen Institute of Baltic Sea Fisheries, Rostock, Germany

\*Corresponding author: tel: + 46 10 4784016; e-mail: [michele.casini@slu.se](mailto:michele.casini@slu.se).

†These authors contributed equally to this study.

Casini, M., Tian, H., Hansson, M., Grygiel, W., Strods, G., Statkus, R., Sepp, E., Gröhsler, T., Orio, A., and Larson, N. Spatio-temporal dynamics and behavioural ecology of a “demersal” fish population as detected using research survey pelagic trawl catches: the Eastern Baltic Sea cod (*Gadus morhua*). – *ICES Journal of Marine Science*, 76: 1931.

Advance access publication 13 April 2019.

ICES Journal of Marine Science (2019), doi:10.1093/icesjms/fsz016.

A couple of corrections have been made to wording as per the below (added text has been underlined):

Page 4, at the end of the left column. “In addition, the pelagic CPUE time-series for the central Baltic Sea, as estimated by our model, was compared to the time-series of cod CPUEs from the bottom trawl surveys in the fourth quarter (BITS and historical national surveys) recently. . . . .”.

Caption Fig. 6. “Comparison between acoustic survey (this study) and bottom trawl survey BITS in the fourth quarter: . . . . .”.
